# Supplementary material for: miR-23a-3p is a Key Regulator of IL-17C-Induced Tumor Angiogenesis in Colorectal Cancer
Source: MDPI journal article supplement (doi:10.3390/cells9061363), 2020-06-01
Supplement: s1 [file s1]

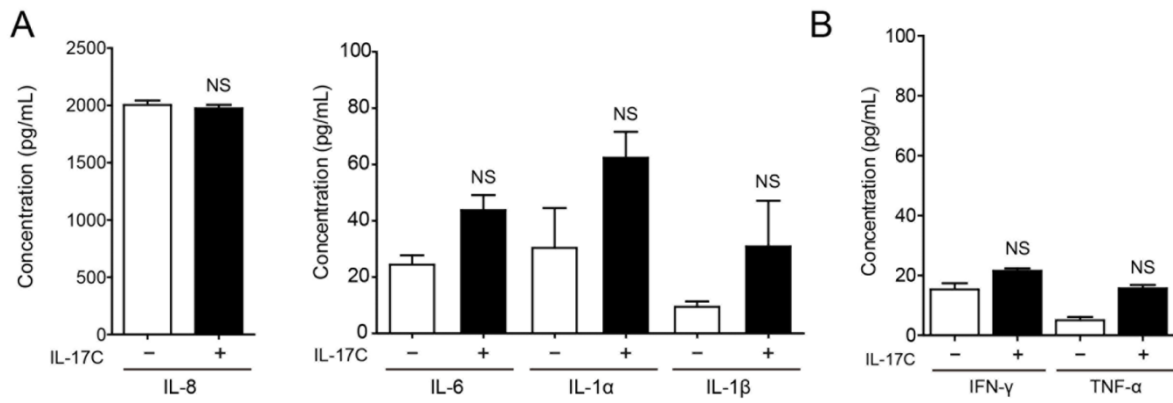

**Supplementary figure S1. Secretion of other angiogenic-associated cytokines is not significantly changed by IL-17C.** (A and B) ELISA protein array was performed to identify and quantify the levels of the secreted proteins such as IL-8, IL-6, IL-1 $\alpha$ , IL-1 $\beta$ , IFN- $\gamma$ , and TNF- $\alpha$  in DLD-1 cells treated with IL-17C (100 ng/ml) for 8 h. Error bars, SD (n=3), NS, not significant.

A

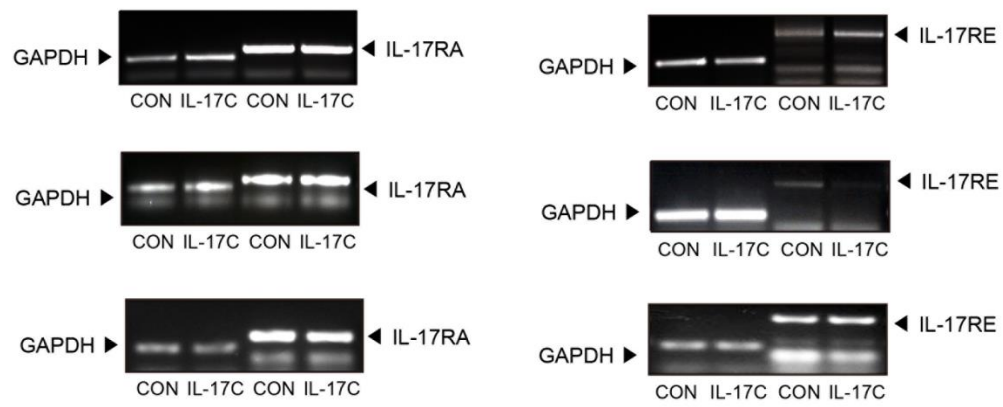

**Supplementary figure S2.** Representative bands and two other repeats of RT-PCR of Figure 1A are shown.

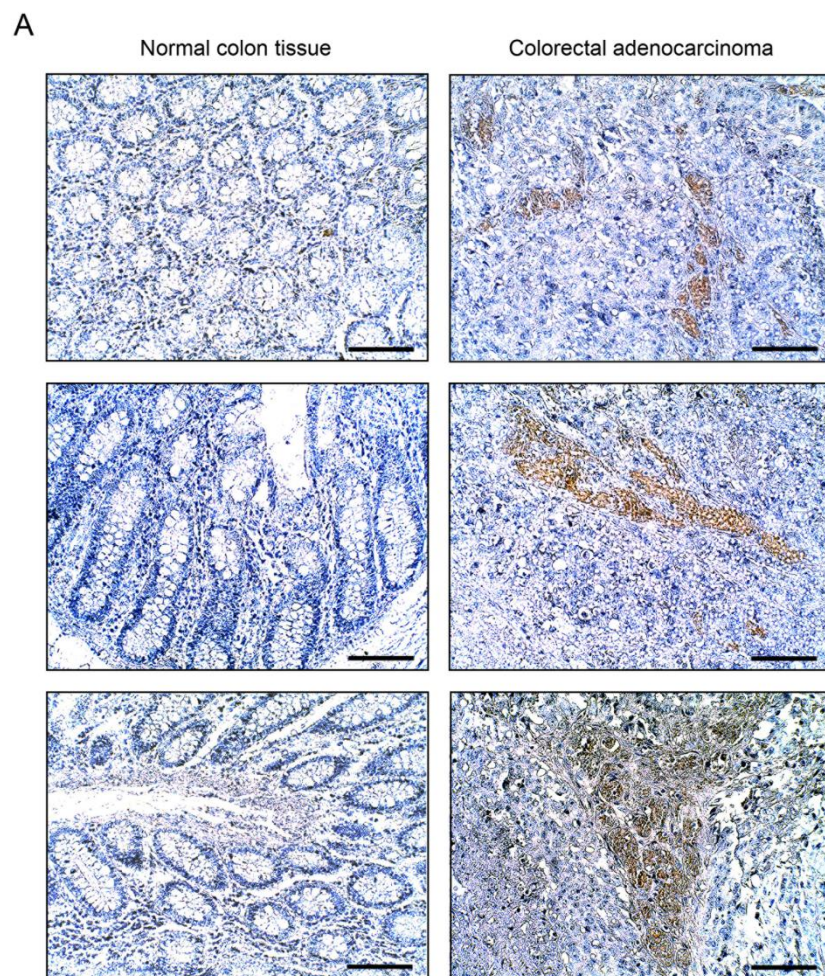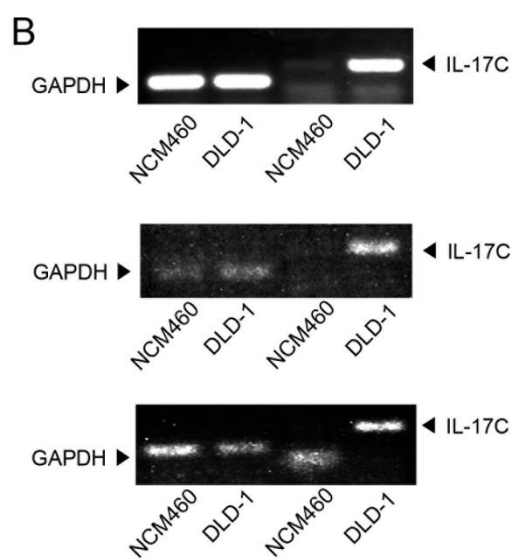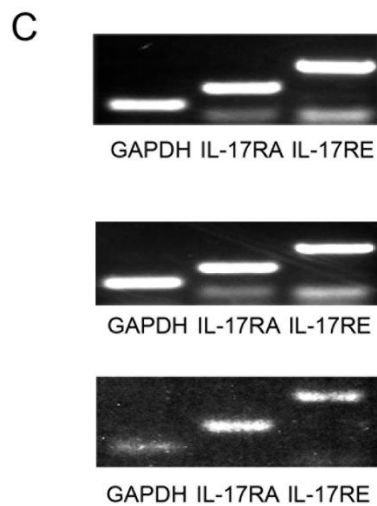

**Supplementary figure S3.** IHC images of Figure 2A and representative bands and two other repeats of RT-PCR of Figure 2B and C are shown.

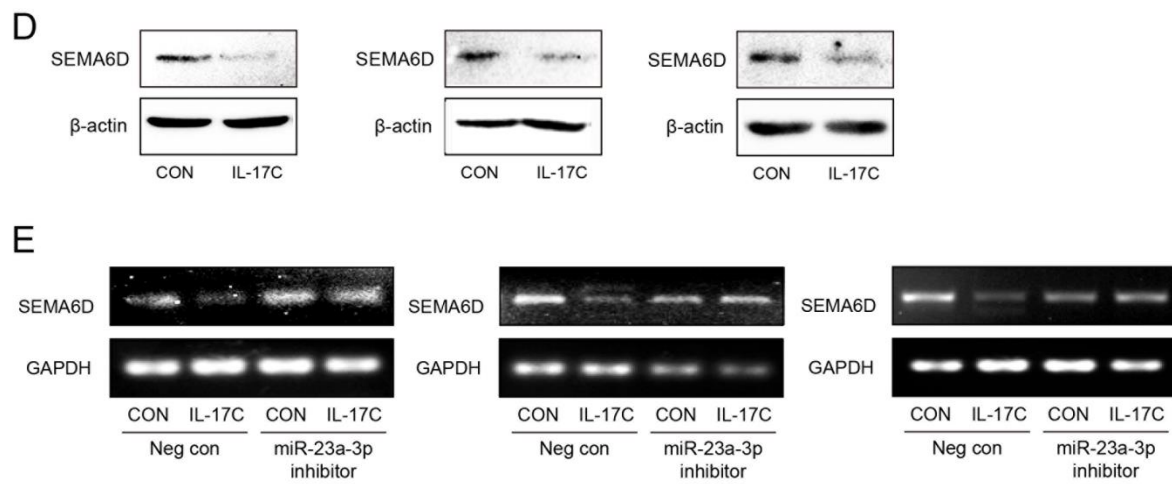

**Supplementary figure S4.** Representative bands and two other repeats of Western blotting of Figure 5D and representative bands and two other repeats of RT-PCR of Figure 5E are shown.

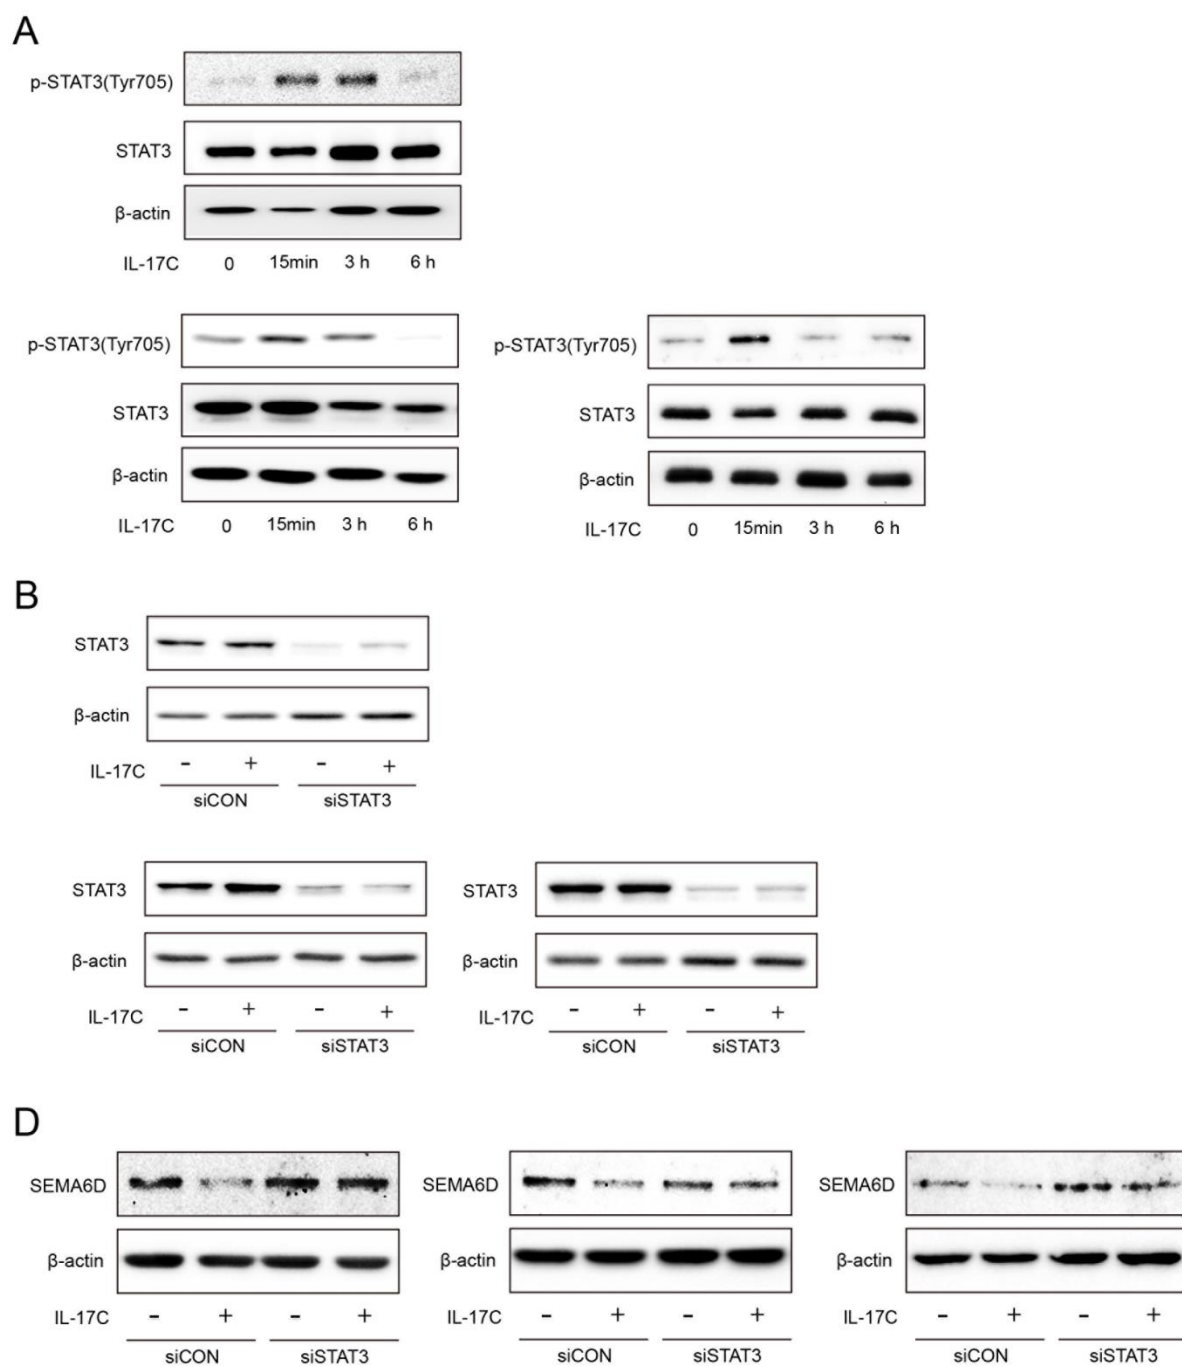

**Supplementary figure S5.** Representative bands and two other repeats of Western blotting of Figure 6A, B, and D are shown.
